# Supplementary material for: Primary Human M2 Macrophage Subtypes Are Distinguishable by Aqueous Metabolite Profiles
Source: MDPI journal article supplement (doi:10.3390/ijms25042407), 2024-02-18
Supplement: s1 [file s1]

# Primary human M2 macrophage subtypes are distinguishable by aqueous metabolite profiles

Amanda L. Fuchs <sup>†‡</sup>, Stephanann M. Costello <sup>‡</sup>, Sage M. Schiller, Brian P. Tripet, and Valérie Copié <sup>\*</sup>

Department of Chemistry and Biochemistry, Montana State University, Bozeman, MT 59717, USA; amanda.fuchs@nih.gov (A.L.F.); stephanann.costello@montana.edu (S.M.C.); sageschiller2@gmail.com (S.M.S.); brian.tripet@montana.edu (B.P.T.)

<sup>\*</sup> Correspondence: vcopie@montana.edu; Tel.: +1-406-994-7244

<sup>†</sup> Current address: National Institutes of Health, National Human Genome Research Institute, Metabolic Medicine Branch, Metabolism, Infection, and Immunity Section, Bethesda, MD 20892, USA.

<sup>‡</sup> These authors contributed equally

Supplementary material included herein consists of the following:

## (A) Supplementary Figures:

**Supplementary Figure S1:** Phenotypic characteristics of primary human monocyte-derived macrophages (MΦs).

**Supplementary Figure S2:** Representative 1D <sup>1</sup>H NMR spectrum of extracellular metabolite extracts obtained from M2 MΦ subtypes.

**Supplementary Figure S3.** 2D and 3D PLS-DA scores plots analysis of M2a, M2b, M2c, and M2d MΦ subtype intra- (A-B) and extracellular (C-D) polar metabolite profiles.

**Supplementary Figure S4.** Validation metrics associated with the PLS-DA modeling of the intracellular metabolite profiles of M2a, M2b, M2c and M2d MΦ subtypes.

**Supplementary Figure S5.** Validation metrics associated with the PLS-DA modeling of the extracellular metabolite profiles of M2a, M2b, M2c and M2d MΦ subtypes.

**Supplementary Figure S6.** Variable Importance in Projection (VIP) score plots associated with the PLS-DA analysis of the intracellular and extracellular metabolite profiles of M2a, M2b, M2c, M2d MΦs.

**Supplementary Figure S7.** Hierarchical clustering analysis (HCA) and heatmap visualizations of M2a (blue), M2b (red), M2c (green), and M2d (yellow) MΦ subtype (A) intra- and (B) extracellular polar metabolite profiles.

## (B) Supplementary Tables:

**Table S1.** Polar metabolites identified in intracellular metabolite extracts of M2 MΦ subtypes.

**Table S2.** Polar metabolites identified in extracellular metabolite extracts of M2 MΦ subtypes.

**Table S3.** One-way parametric ANOVA analysis of intracellular M2a, M2b, M2c, and M2d MΦ metabolite levels with Tukey's post-hoc analysis.

**Table S4.** One-way parametric ANOVA analysis of extracellular M2a, M2b, M2c, and M2d MΦ metabolite levels with Tukey's post-hoc analysis.

**Table S5.** One-way parametric ANOVA analysis of intracellular M2b, M2c, and M2d MΦ metabolite levels with Tukey's post-hoc analysis.

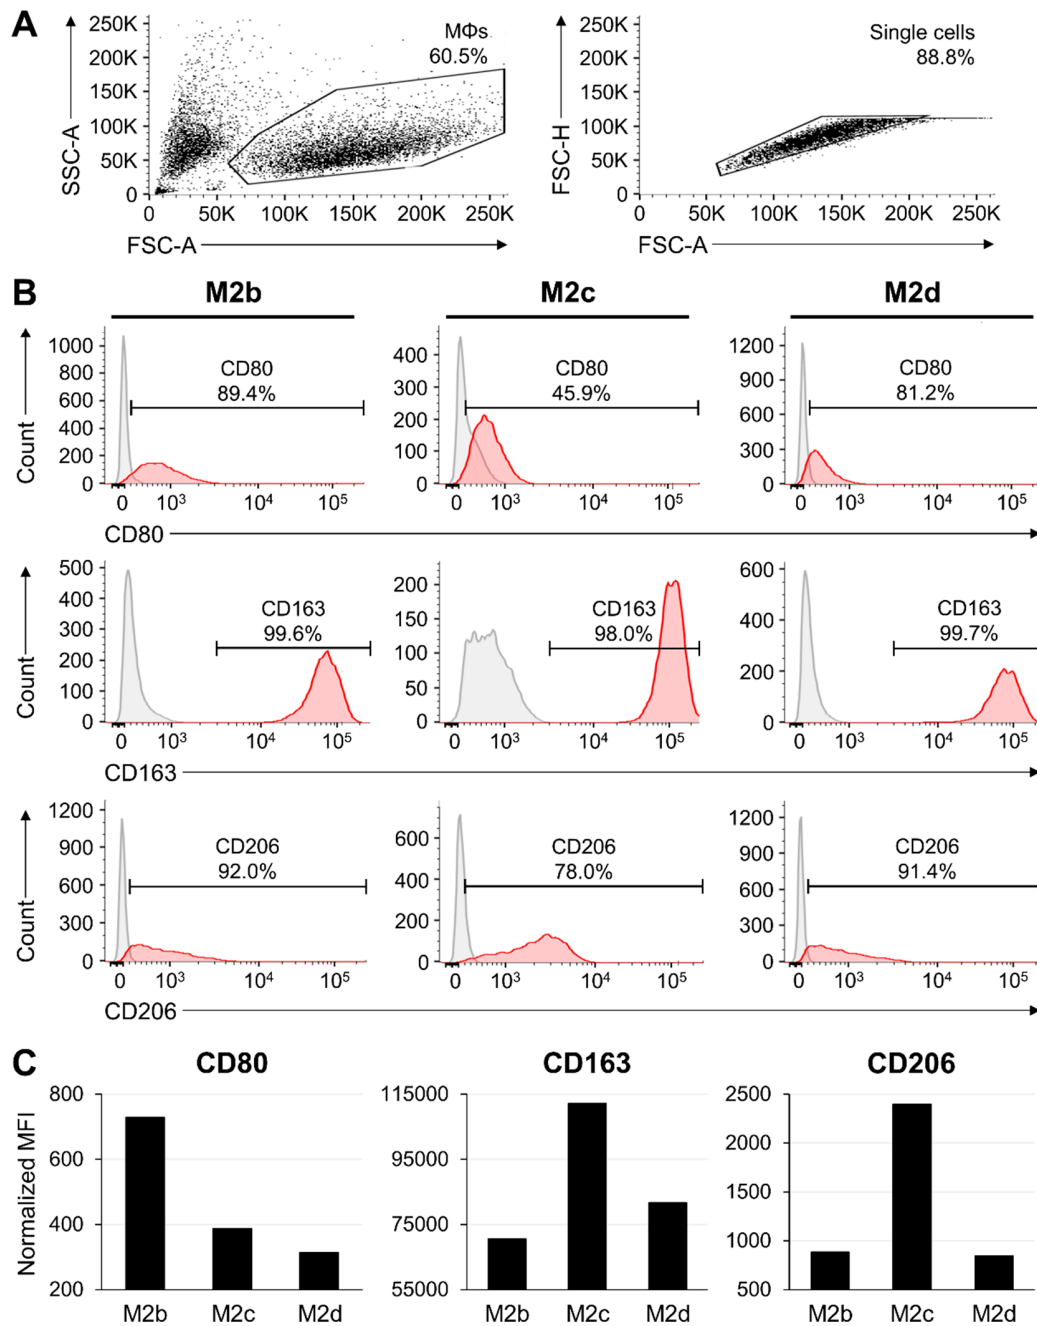

**Figure S1.** Phenotypic characteristics of primary human monocyte-derived macrophages (MΦs). **(A)** Gating strategy for FACS analysis of MΦs; **(B)** Histograms of CD80, CD163, and CD206 expression (red) by M2b, M2c, and M2d MΦs along with appropriate isotype controls (gray); **(C)** Normalized mean fluorescence intensity (MFI) of CD80, CD163, and CD206 expression by M2b, M2c, and M2d MΦs.

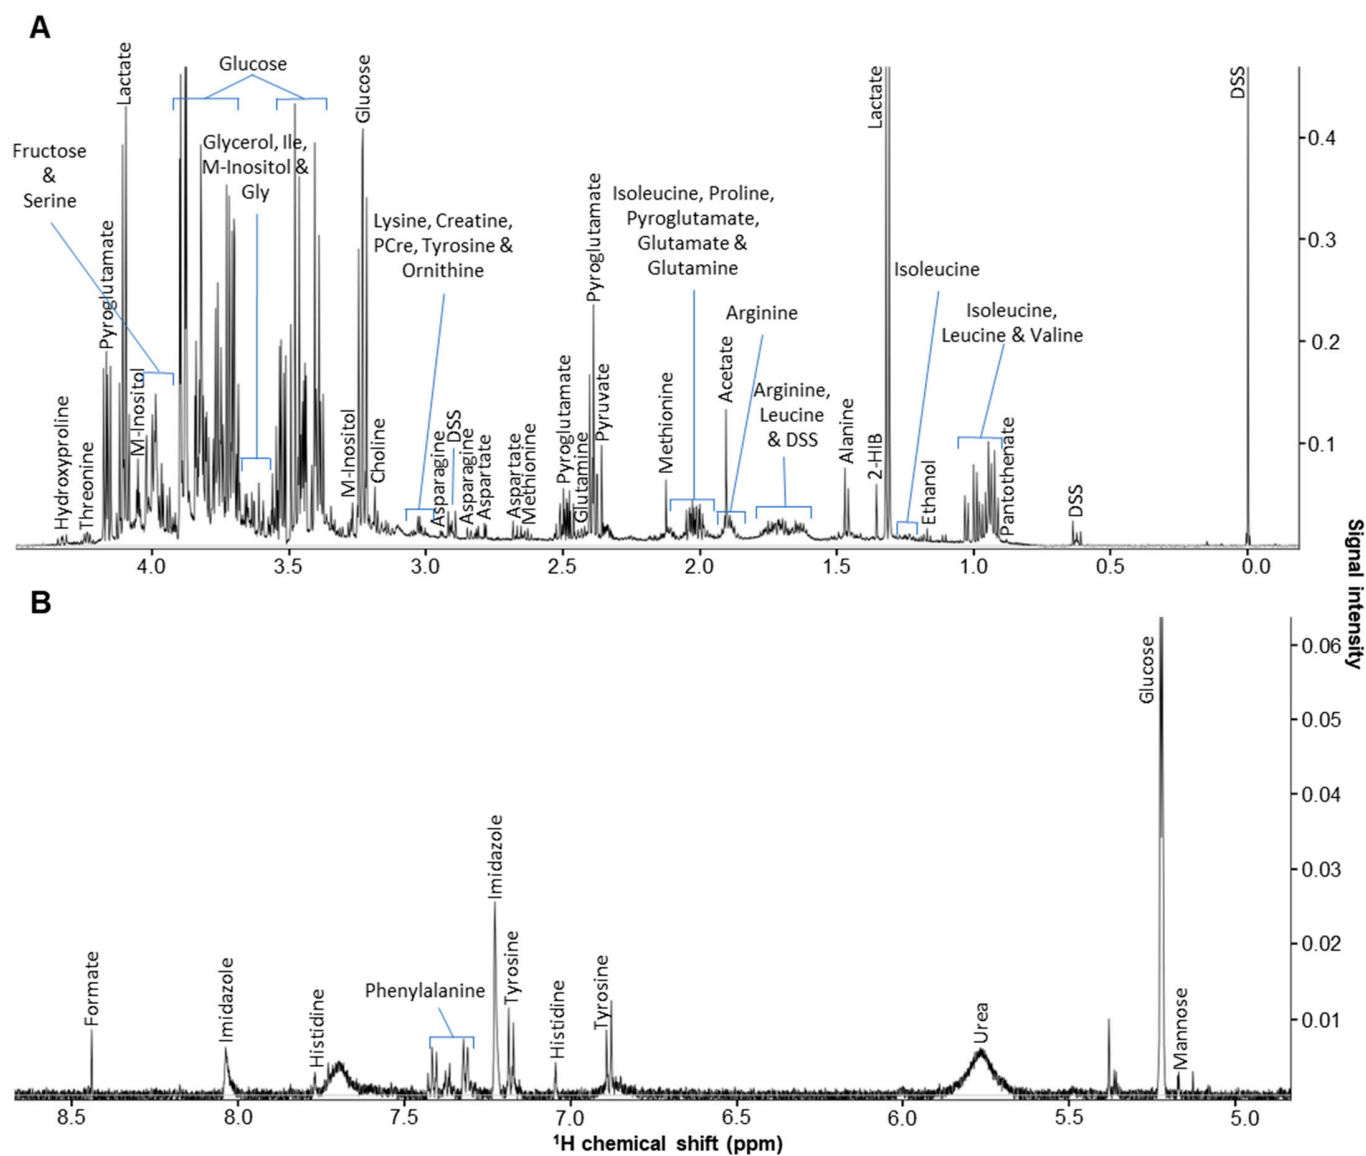

**Figure S2.** Representative 1D  $^1\text{H}$  NMR spectrum of extracellular metabolite extracts obtained from M2 MΦ subtypes.  $^1\text{H}$  chemical shift regions corresponding to the **(A)** 0.0 to ~4.5 ppm and **(B)** 5.0 to ~9 ppm spectral regions are depicted. Abbreviations denote: DSS, 4,4-dimethyl-4-silapentane-1-sulfonic acid.

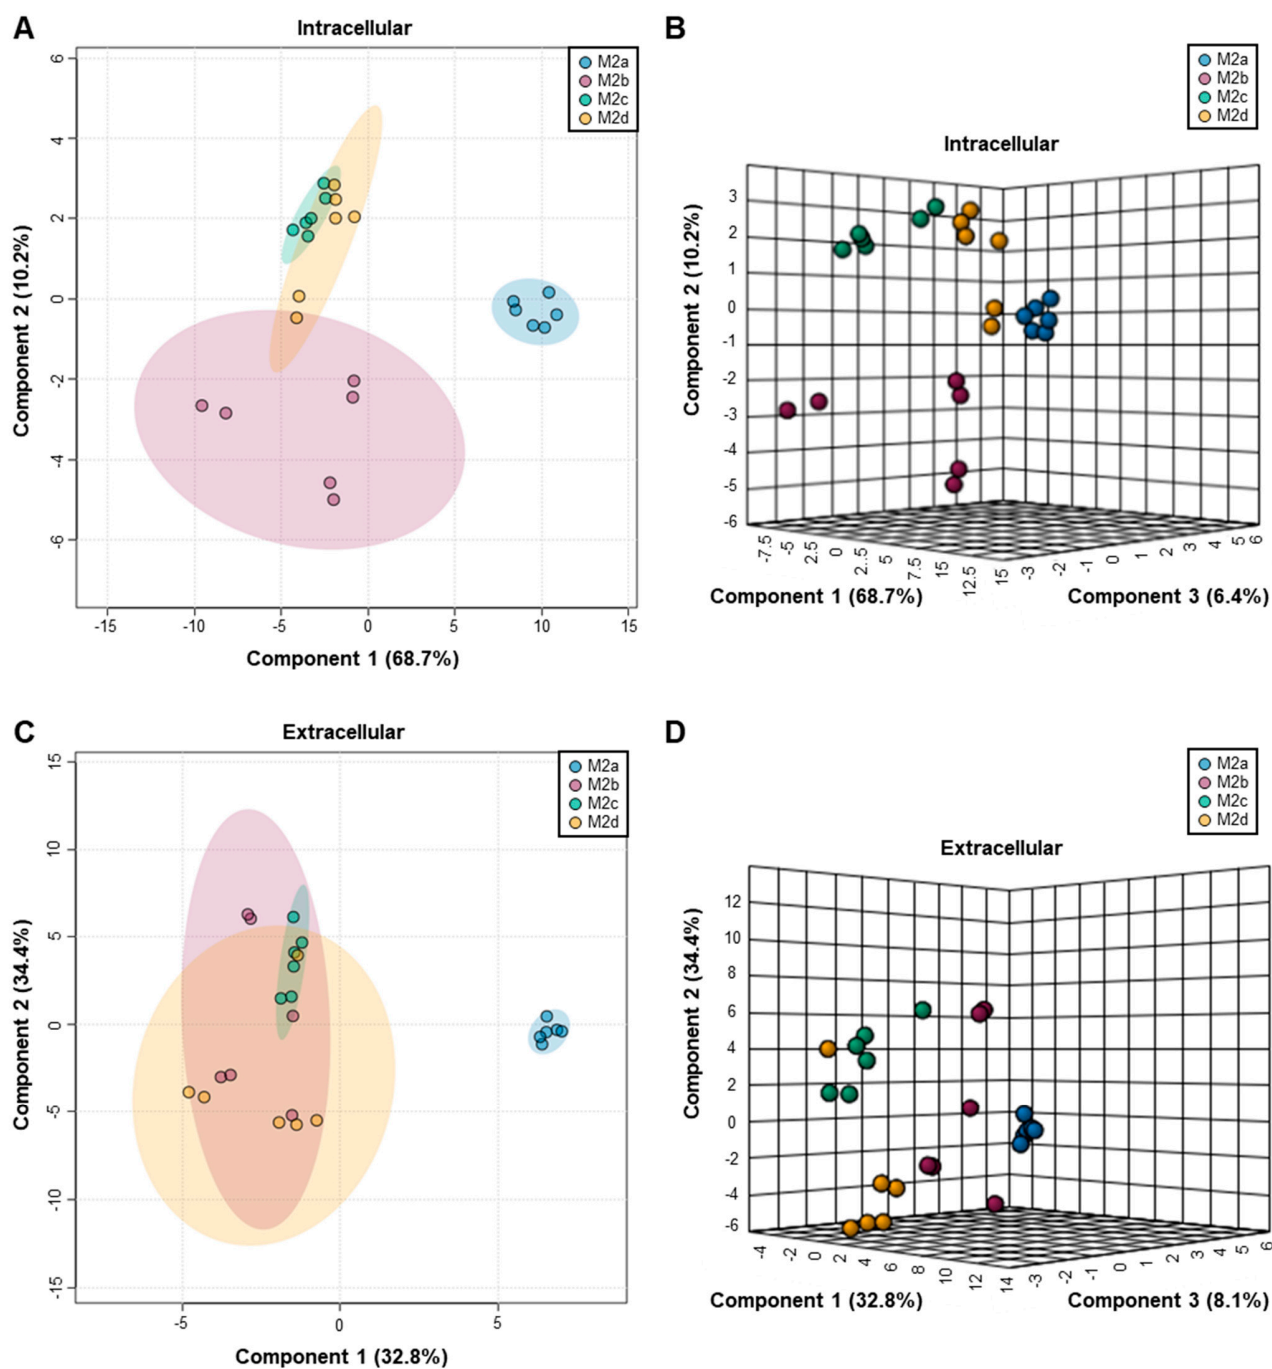

**Figure S3.** 2D and 3D PLS-DA scores plots analysis of M2a, M2b, M2c, and M2d MΦ subtype intra- (A-B) and extracellular (C-D) polar metabolite profiles. Shaded ellipses indicate corresponding 95% confidence intervals.

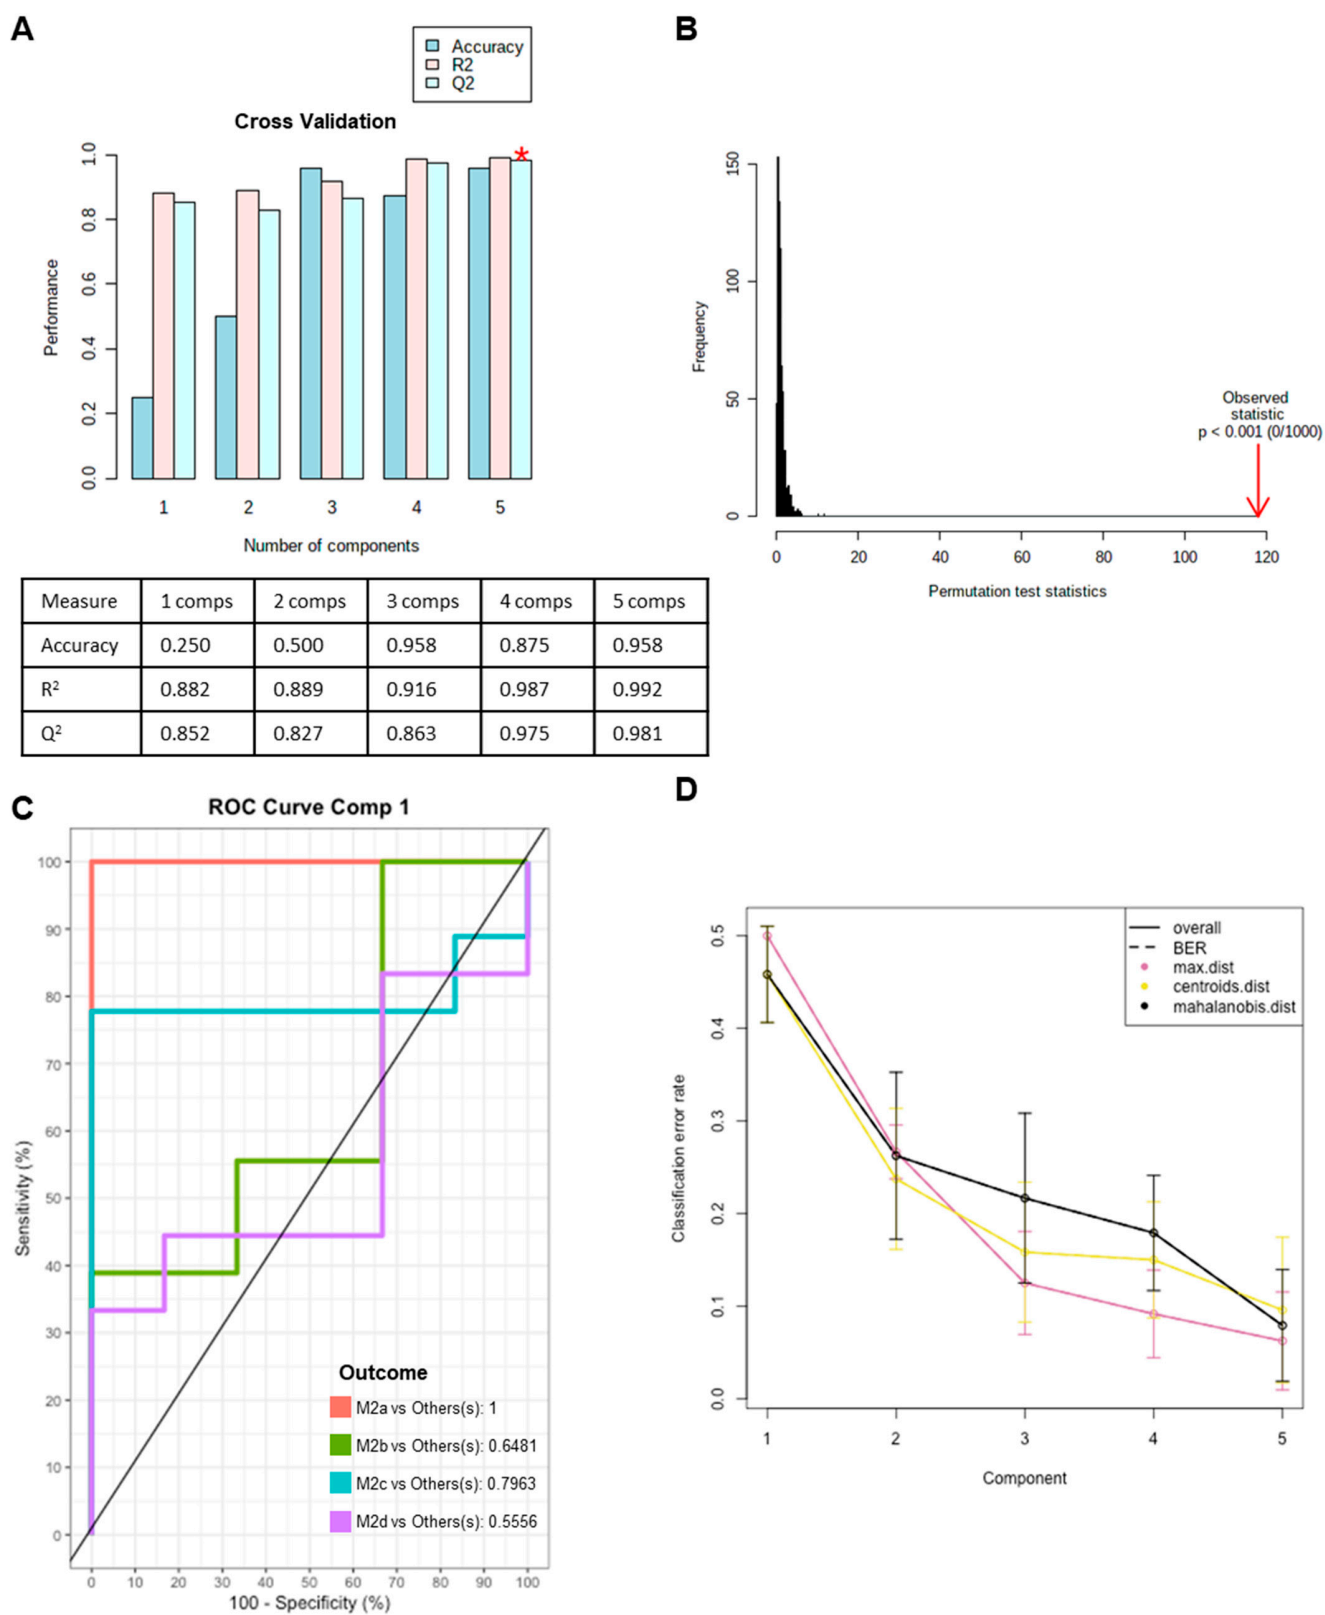

**Figure S4.** Validation metrics associated with the PLS-DA modeling of the intracellular metabolite profiles of M2a, M2b, M2c and M2d MΦ subtypes. (A) Leave-one-out cross validation (LOOCV) plot demonstrated model

significance with an accuracy score of 0.958, an  $R^2$  of 0.992, and  $Q^2$  of 0.981, when taking into account the first 5 components of the PLS-DA model. The accuracy score (0.958),  $R^2$  (0.916), and  $Q^2$  (0.863) scores also demonstrated model significance by the 3<sup>rd</sup> component. The prediction accuracy (B) permutation test ( $n = 1000$  tests) yielded a significant p-values  $< 0.001$ , attesting to the validity and prediction accuracy of the PLS-DA model, demonstrating high model accuracy and specificity for the separate classification of M2 MΦ subtypes. (C) The area under receiver operating characteristic (ROC) curves yielded an AUC value of 1, 0.64, 0.80, and 0.55 for the comparison of M2a, M2b, M2c and M2d MΦ subtypes, respectively. (E) Classification error rate (CER) yielded an overall classification error rate of ~25% for component 3 and less than 25% for component 4 (and beyond) of the PLS-DA model.

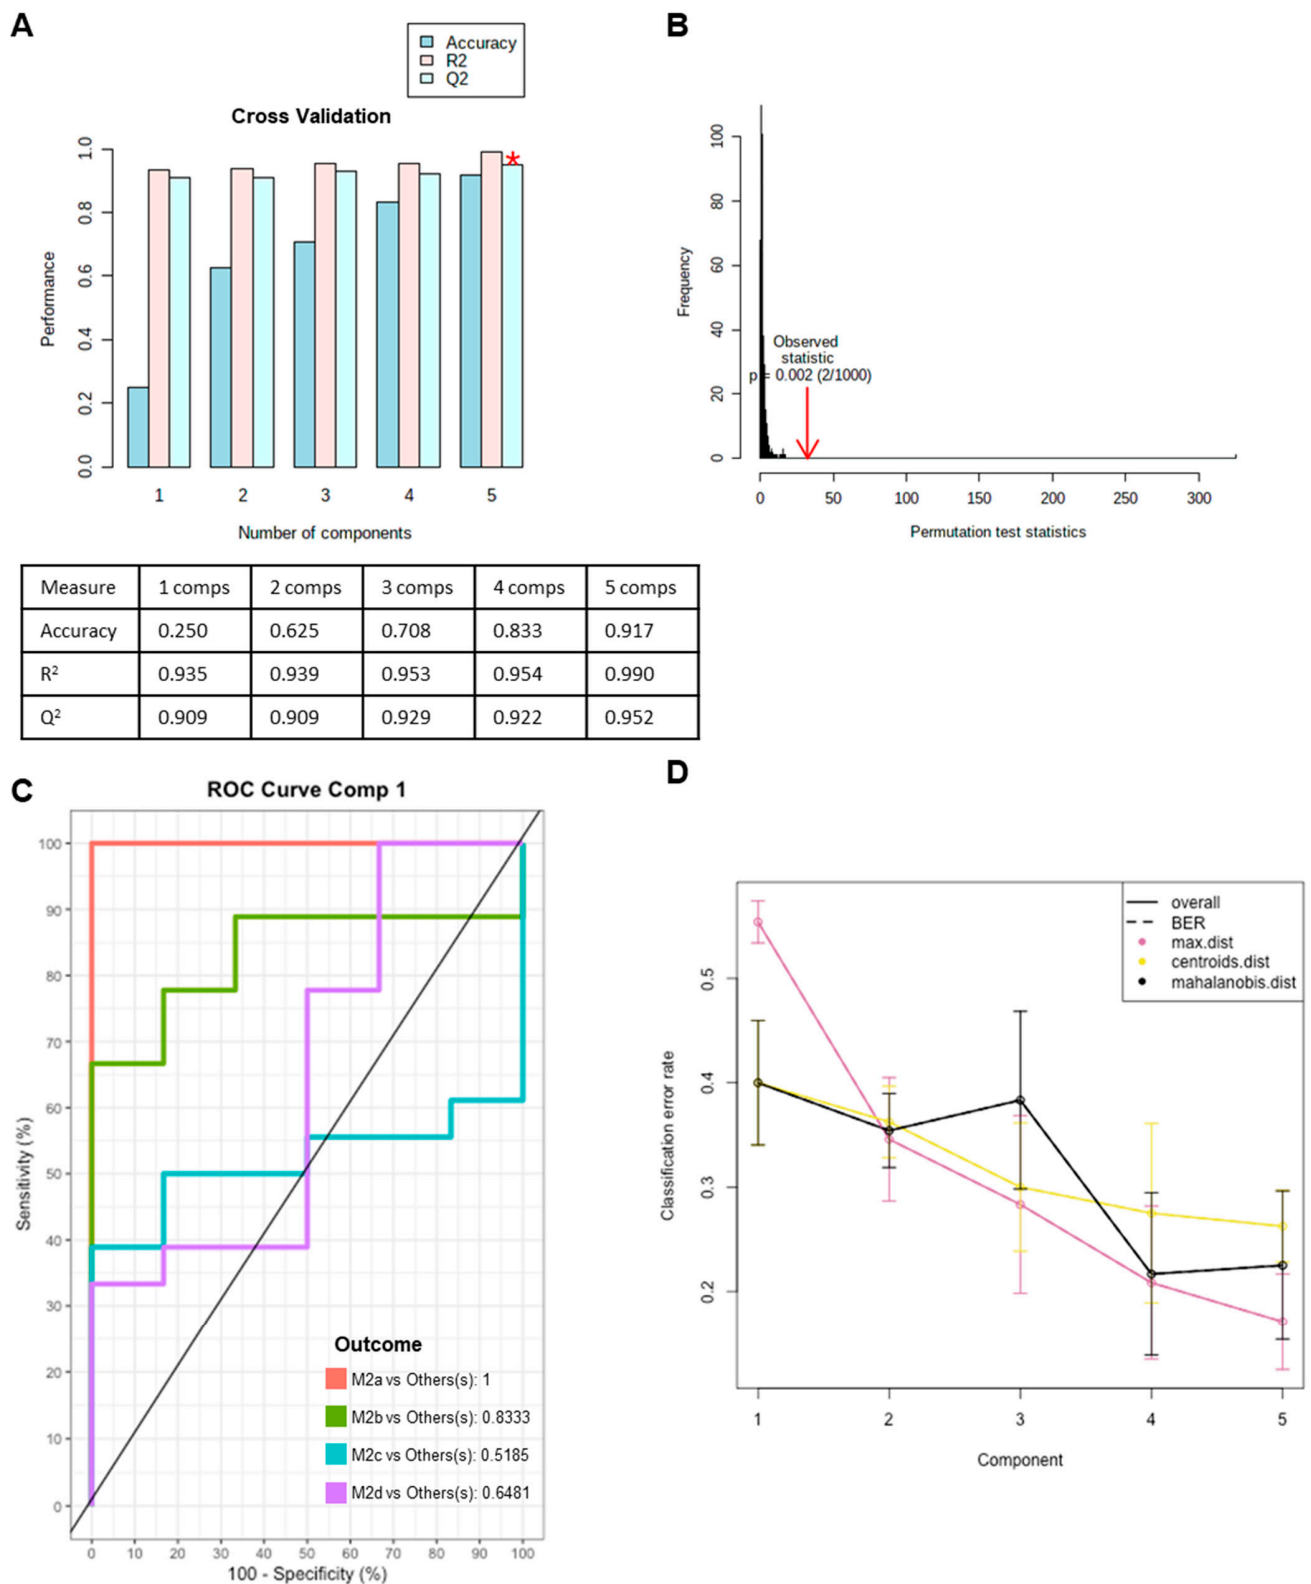

**Figure S5.** Validation metrics associated with the PLS-DA modeling of the extracellular metabolite profiles of M2a, M2b, M2c and M2d MΦ subtypes. (A) Leave-one-out cross validation (LOOCV) plot demonstrated model



significance with an accuracy score of 0.917, an  $R^2$  of 0.990, and  $Q^2$  of 0.952, when taking into account the first 5 components of the PLS-DA model. The accuracy score (0.708),  $R^2$  (0.953), and  $Q^2$  (0.929) scores also demonstrated model significance by the 3<sup>rd</sup> component. The prediction accuracy (B) permutation test ( $n = 1000$  tests) yielded a significant p-values  $< 0.002$ , attesting to the validity and prediction accuracy of the PLS-DA model, demonstrating high model accuracy and specificity for the separate classification of M2 MΦ subtypes. (C) The area under receiver operating characteristic (ROC) curves yielded an AUC value of 1, 0.83, 0.52, and 0.64 for the comparison of M2a, M2b, M2c and M2d MΦ subtypes, respectively. (E) Classification error rate (CER) yielded an overall classification error rate of ~40% for component 3 and less than 30% for component 4 (and beyond) of the PLS-DA model.

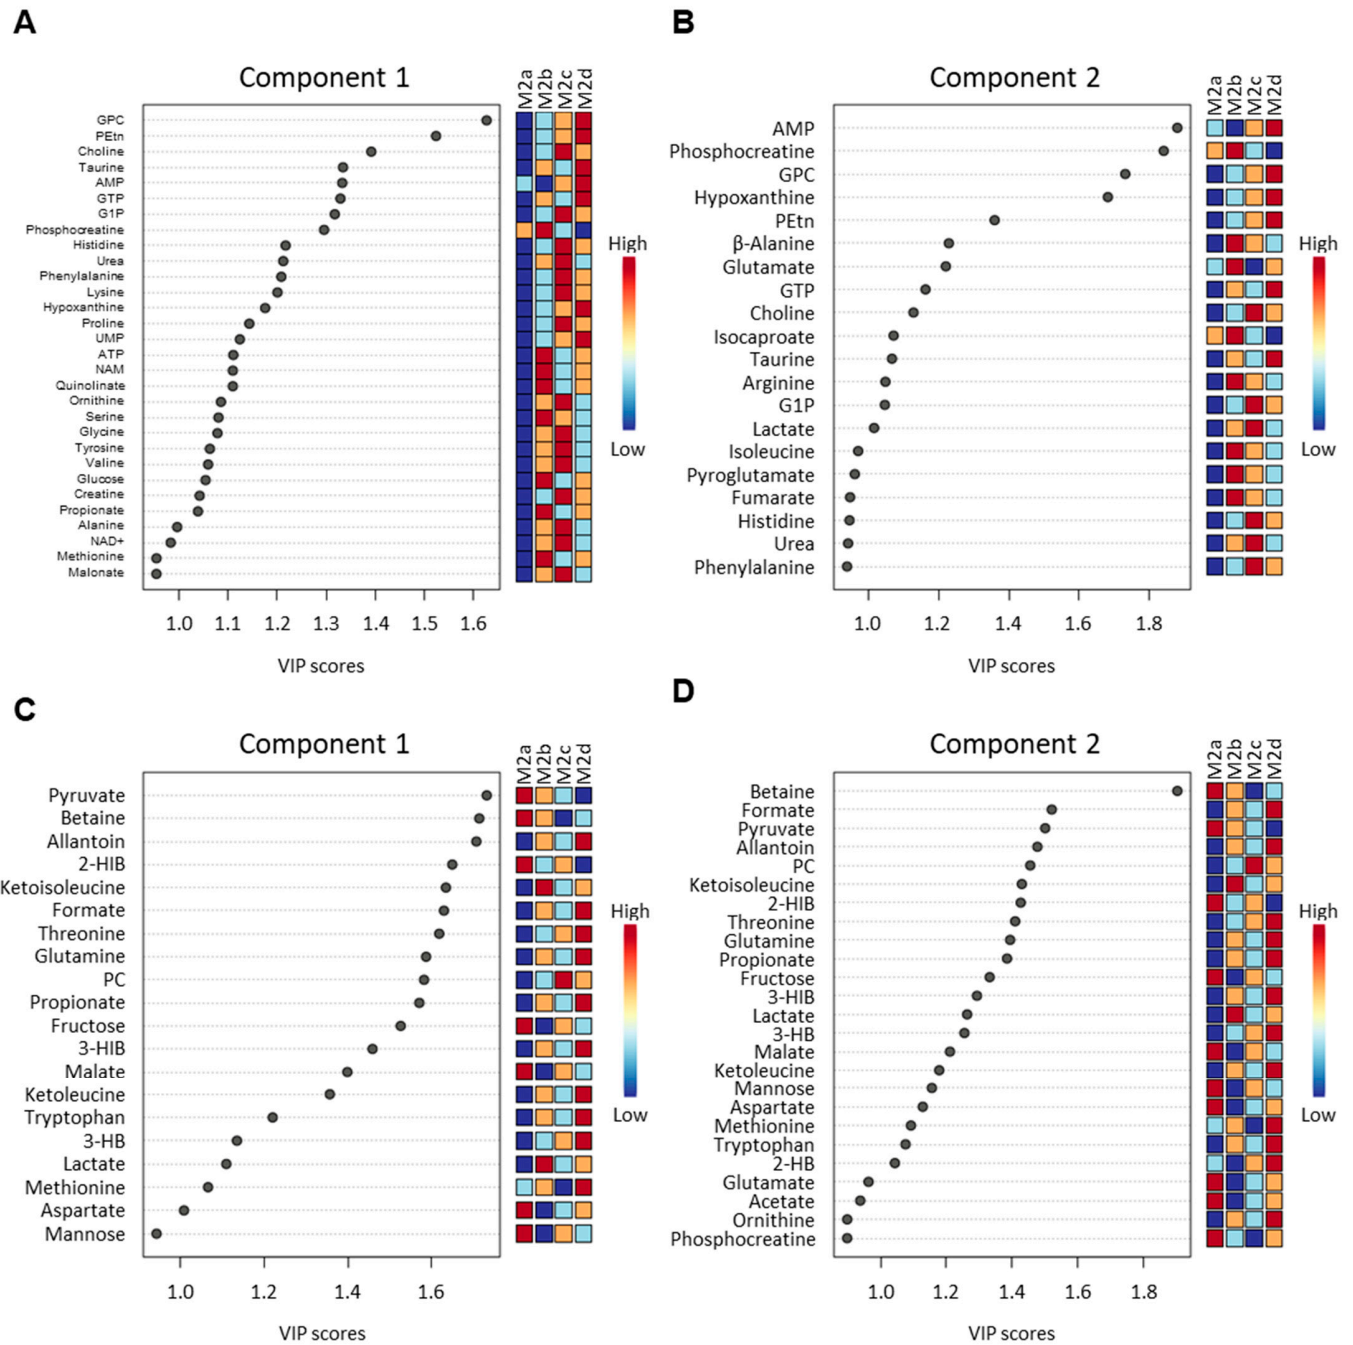

**Figure S6.** Variable Importance in Projection (VIP) score plots associated with the PLS-DA analysis for intracellular and extracellular metabolite profiles of M2a, M2b, M2c, M2d MΦs. Panels correspond to the intracellular (A-B) and extracellular (C-D) PLS-DAs, indicating which metabolites contribute most to the separation observed along component 1, and component 2 of both the intra- and extracellular PLS-DAs (Figure S3). The heatmap gradient indicates the metabolite level is relatively high or low in the corresponding M2 MΦ subtype. Abbreviations: GPC, glycerophosphocholine; PEtn, phosphatidyl ethanolamine; AMP, adenosine monophosphate; GTP, guanosine triphosphate; G1P, glucose-1-phosphate; UMP, uridine monophosphate; ATP, adenosine triphosphate; NAM, niacinamide; NAD<sup>+</sup>, nicotinamide adenine dinucleotide; 3-HIB, 3-hydroxyisobutyrate; PC, phosphocholine; 3-HIB, 3-hydroxyisobutyrate; 3-HB, 3-hydroxybutyrate; 2-HIB, 2-hydroxyisobutyrate; and 2-HB, 2-hydroxybutyrate.

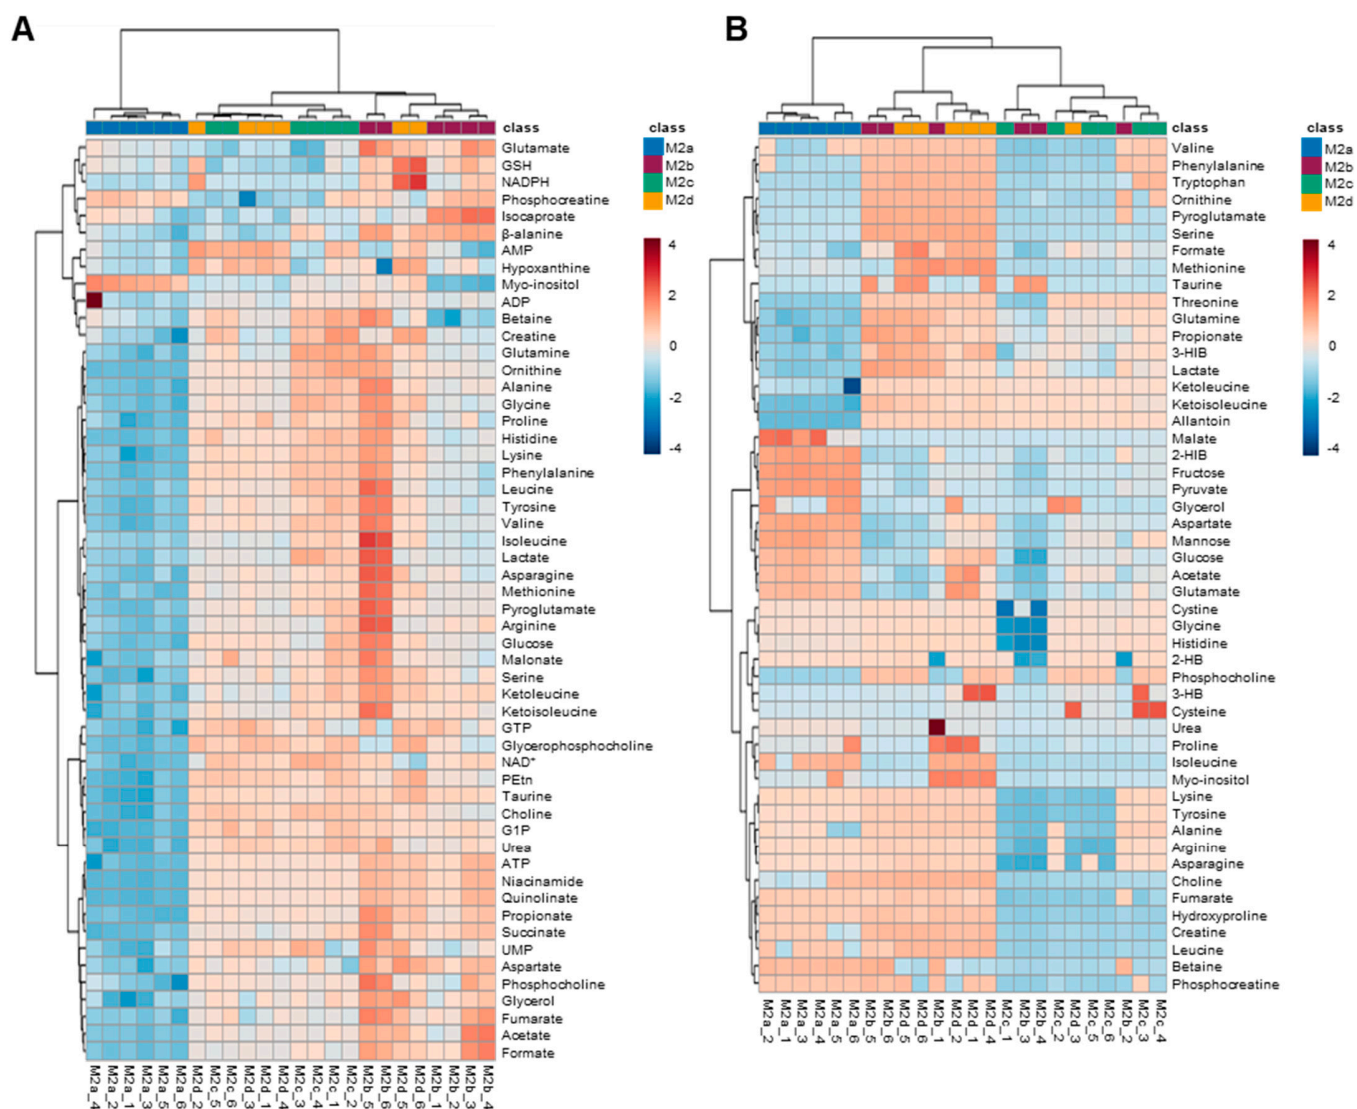

**Figure S7.** Hierarchical clustering analysis (HCA) and heatmap visualizations of M2a (blue), M2b (red), M2c (green), and M2d (yellow) MΦ subtype (A) intra- and (B) extracellular polar metabolite profiles. The color scales represent the scaled abundance of each metabolite, with dark red and blue indicating high and low abundance, respectively. Abbreviations denote: 2-HB, 2-hydroxybutyrate; 3-HB, 3-hydroxybutyrate; 2-HIB, 2-hydroxyisobutyrate; 3-HIB, 3-hydroxyisobutyrate; ADP, adenosine diphosphate; AMP, adenosine monophosphate; ATP, adenosine triphosphate; G1P, glucose-1-phosphate; GSH, glutathione; GTP, guanosine triphosphate; NAD<sup>+</sup>, nicotinamide adenine dinucleotide; NADPH, nicotinamide adenine dinucleotide phosphate; PEtn, phosphatidyl ethanolamine; UMP, uridine monophosphate.

**Table S1.** Polar metabolites identified in intracellular metabolite extracts of M2 MΦ subtypes.

| Metabolite       | Concentration (nmol/mg) <sup>1</sup> |       |        |        |        |        |        |       |
|------------------|--------------------------------------|-------|--------|--------|--------|--------|--------|-------|
|                  | M2a                                  |       | M2b    |        | M2c    |        | M2d    |       |
|                  | Mean                                 | SD    | Mean   | SD     | Mean   | SD     | Mean   | SD    |
| Acetate          | 3.34                                 | 0.42  | 91.42  | 72.66  | 21.74  | 3.58   | 28.75  | 20.16 |
| ADP              | 33.17                                | 48.76 | 18.14  | 3.47   | 18.63  | 1.46   | 16.54  | 2.12  |
| Alanine          | 2.57                                 | 0.27  | 11.13  | 6.42   | 10.04  | 1.93   | 7.52   | 0.97  |
| AMP              | 7.19                                 | 1.03  | 7      | 1.51   | 11.9   | 3.25   | 14.5   | 1.6   |
| Arginine         | 7.49                                 | 1.04  | 36.73  | 23.65  | 20.33  | 5.19   | 16.73  | 1.09  |
| Asparagine       | 3.54                                 | 0.65  | 13.27  | 9.18   | 8.89   | 1.16   | 8.29   | 1.77  |
| Aspartate        | 1.64                                 | 0.22  | 4.51   | 0.71   | 2.85   | 0.71   | 3.94   | 1.27  |
| ATP              | 0.28                                 | 0.05  | 1.84   | 0.36   | 1.2    | 0.04   | 1.35   | 0.27  |
| Betaine          | 2.15                                 | 0.37  | 2.66   | 1.57   | 3.77   | 0.3    | 2.67   | 0.21  |
| Choline          | 0.86                                 | 0.19  | 5.17   | 2.03   | 8.69   | 0.38   | 6.68   | 0.75  |
| Creatine         | 3.19                                 | 0.66  | 4.37   | 0.3    | 6.58   | 0.68   | 5.07   | 1.44  |
| Formate          | 4.29                                 | 0.34  | 32.28  | 13.14  | 12.7   | 2.1    | 15.47  | 4.37  |
| Fumarate         | 0.61                                 | 0.06  | 1.67   | 0.4    | 1.06   | 0.13   | 1.06   | 0.24  |
| GIP              | 0.31                                 | 0.05  | 3.81   | 0.67   | 5.09   | 1.49   | 4.01   | 0.9   |
| Glucose          | 4.53                                 | 1.05  | 104.79 | 114.05 | 52.4   | 30.64  | 44.38  | 6.45  |
| Glutamate        | 14.83                                | 1.82  | 28.7   | 7.07   | 10.75  | 3.1    | 16.14  | 5.22  |
| Glutamine        | 9.69                                 | 1.56  | 24.56  | 10.86  | 34.05  | 7.15   | 20.02  | 4.18  |
| Glutathione      | 9.62                                 | 1.22  | 13.73  | 1.7    | 7.96   | 1.73   | 14.43  | 7.35  |
| Glycerol         | 0.44                                 | 0.3   | 7.67   | 5.32   | 3.45   | 0.91   | 5.59   | 6.04  |
| Glycine          | 8.48                                 | 0.82  | 18.94  | 7.3    | 20.74  | 2.68   | 17.31  | 2.89  |
| GPC              | 0.85                                 | 0.11  | 4.29   | 1.93   | 11.69  | 2.34   | 16.96  | 2.84  |
| GTP              | 1.82                                 | 0.23  | 3.86   | 0.89   | 3.8    | 0.67   | 4.44   | 0.5   |
| Histidine        | 0.63                                 | 0.05  | 3.79   | 2.93   | 4.26   | 0.85   | 3.25   | 0.31  |
| Hypoxanthine     | 1.19                                 | 0.22  | 1.55   | 0.6    | 1.92   | 0.72   | 3.12   | 0.31  |
| Isocaproate      | 0.39                                 | 0.19  | 1.8    | 1.14   | 0.24   | 0.07   | 0.23   | 0.1   |
| Isoleucine       | 3.2                                  | 0.22  | 8.95   | 6.55   | 6.3    | 1.13   | 5.47   | 0.88  |
| Ketoleucine      | 0.34                                 | 0.07  | 2.65   | 1.88   | 1.61   | 0.21   | 1.22   | 0.2   |
| Ketoleucine      | 0.12                                 | 0.04  | 1.25   | 0.65   | 0.82   | 0.28   | 0.62   | 0.3   |
| Lactate          | 143.89                               | 16.31 | 448.7  | 317.16 | 387.85 | 101.06 | 240.41 | 12.9  |
| Leucine          | 3.24                                 | 0.42  | 11.85  | 9.37   | 10.73  | 1.67   | 7.87   | 0.65  |
| Lysine           | 0.79                                 | 0.22  | 7.2    | 5.73   | 7.55   | 1.19   | 5.49   | 1.01  |
| Malonate         | 0.31                                 | 0.13  | 5.13   | 5.55   | 3.86   | 1.61   | 1.84   | 0.36  |
| Methionine       | 0.62                                 | 0.08  | 2.88   | 1.98   | 1.87   | 0.31   | 1.87   | 0.28  |
| myo-Inositol     | 51.8                                 | 7.38  | 19.08  | 7.35   | 26.58  | 1.96   | 26.71  | 7.29  |
| NAD <sup>+</sup> | 0.53                                 | 0.13  | 5.53   | 0.7    | 9.69   | 1.78   | 3.86   | 2.14  |
| NADPH            | 1.08                                 | 0.08  | 1.84   | 0.36   | 1.2    | 0.04   | 2.7    | 1.7   |
| Niacinamide      | 0.29                                 | 0.01  | 1.84   | 0.36   | 1.2    | 0.04   | 1.35   | 0.27  |
| Ornithine        | 0.29                                 | 0.01  | 6      | 4.98   | 8.57   | 4.16   | 3      | 0.47  |
| PEtn             | 15.2                                 | 2.74  | 61.52  | 6.95   | 95.05  | 13.62  | 106.6  | 19.91 |
| Phenylalanine    | 0.6                                  | 0.07  | 4.73   | 4.24   | 5.12   | 0.69   | 3.73   | 0.37  |
| Phosphocholine   | 7.24                                 | 1.61  | 16.14  | 5.06   | 12.14  | 0.46   | 11.95  | 0.71  |
| Phosphocreatine  | 1.5                                  | 0.2   | 1.6    | 0.28   | 0.74   | 0.47   | 0.46   | 0.22  |
| Proline          | 5.03                                 | 1.06  | 15.69  | 7.73   | 15.44  | 1.6    | 14.46  | 3.04  |
| Propionate       | 0.61                                 | 0.06  | 4.38   | 1.95   | 2.43   | 0.17   | 2.9    | 0.72  |
| Pyroglutamate    | 7.43                                 | 1.34  | 70.55  | 66.79  | 38.15  | 9.17   | 26.44  | 4.58  |
| Quinolate        | 0.29                                 | 0.01  | 1.84   | 0.36   | 1.2    | 0.04   | 1.35   | 0.27  |
| Serine           | 1.99                                 | 0.53  | 19.13  | 13.11  | 13.49  | 3.65   | 12.61  | 4.17  |
| Succinate        | 0.68                                 | 0.09  | 5.89   | 2.44   | 3.1    | 0.57   | 2.95   | 0.91  |
| Taurine          | 36.21                                | 5.8   | 144.86 | 5.18   | 139.05 | 12.83  | 154.91 | 27.94 |

|                  |      |      |       |       |       |       |       |       |
|------------------|------|------|-------|-------|-------|-------|-------|-------|
| Tyrosine         | 0.93 | 0.13 | 4.36  | 3.25  | 3.67  | 0.83  | 3.17  | 0.41  |
| UMP              | 1.81 | 0.27 | 3.24  | 0.93  | 3.23  | 0.79  | 3.43  | 0.4   |
| Urea             | 3.07 | 1.22 | 62.93 | 40.96 | 69.49 | 18.64 | 48.26 | 17.44 |
| Valine           | 1.87 | 0.23 | 7.82  | 5.44  | 7.03  | 1.01  | 5.71  | 0.43  |
| $\beta$ -Alanine | 2.14 | 0.46 | 5.87  | 0.33  | 3.04  | 0.88  | 2.91  | 1.32  |

<sup>1</sup>A total of 54 metabolites were identified in intracellular M2 M $\Phi$  subtype spectra and exported as  $\mu$ M concentrations. The data were normalized using blank NMR buffer controls, the running NMR buffer volume, and protein content to report concentrations as nmol/mg. The mean and standard deviation (SD) for each normalized metabolite is shown for the M2a, M2b, M2c and M2d M $\Phi$  subtypes. Abbreviations denote: ADP, adenosine diphosphate; AMP, adenosine monophosphate; ATP, adenosine triphosphate; G1P, glucose-1-phosphate; GPC, glycerophosphocholine; GTP, guanosine triphosphate; NAD<sup>+</sup>, nicotinamide adenine dinucleotide; NADPH, nicotinamide adenine dinucleotide phosphate; PEtn, phosphatidyl ethanolamine; UMP, uridine monophosphate.

**Table S2.** Polar metabolites identified in extracellular metabolite extracts of M2 MΦ subtypes.

| Metabolite      | Concentration (nmol/mg) <sup>2</sup> |          |           |          |           |          |           |          |
|-----------------|--------------------------------------|----------|-----------|----------|-----------|----------|-----------|----------|
|                 | M2a                                  |          | M2b       |          | M2c       |          | M2d       |          |
|                 | Mean                                 | SD       | Mean      | SD       | Mean      | SD       | Mean      | SD       |
| 2-HB            | 23.43                                | 6.65     | -5.34     | 39.43    | 32.73     | 12.94    | 42.50     | 20.80    |
| 2-HIB           | -169.95                              | 5.48     | -502.18   | 153.69   | -451.26   | 41.94    | -519.12   | 47.37    |
| 3-HB            | -96.50                               | 3.52     | -106.54   | 48.54    | -21.96    | 21.10    | -10.31    | 25.91    |
| 3-HIB           | 12.49                                | 1.85     | 64.77     | 33.66    | 35.17     | 16.82    | 84.33     | 24.38    |
| Acetate         | -213.14                              | 25.19    | -1273.28  | 566.71   | -693.10   | 285.30   | -655.69   | 572.67   |
| Alanine         | 20.73                                | 32.54    | 179.31    | 899.81   | 5.30      | 269.47   | 842.94    | 405.05   |
| Allantoin       | -28.01                               | 5.58     | 1244.65   | 647.21   | 384.92    | 84.82    | 1299.62   | 482.54   |
| Arginine        | 788.70                               | 181.40   | 2243.74   | 3107.49  | -100.85   | 742.78   | 2363.24   | 1418.71  |
| Asparagine      | 108.27                               | 20.01    | -98.20    | 993.36   | -38.21    | 267.35   | 1276.55   | 764.56   |
| Aspartate       | -573.21                              | 20.11    | -2530.94  | 604.37   | -1891.74  | 209.07   | -1600.60  | 755.08   |
| Betaine         | 7.74                                 | 2.48     | -14.95    | 59.11    | -42.67    | 11.75    | -21.27    | 17.76    |
| Choline         | 6.41                                 | 13.55    | -75.09    | 177.63   | -92.77    | 59.21    | 74.01     | 64.57    |
| Creatine        | 3.80                                 | 3.33     | -23.39    | 129.58   | -85.00    | 23.88    | 66.58     | 59.73    |
| Cysteine        | -125.00                              | 10.18    | -231.00   | 65.07    | -47.15    | 59.86    | -140.46   | 161.95   |
| Cystine         | 468.59                               | 56.96    | 595.48    | 740.46   | 308.27    | 232.12   | 949.43    | 296.93   |
| Formate         | 228.89                               | 60.64    | 389.50    | 184.67   | 319.73    | 39.02    | 1049.71   | 310.57   |
| Fructose        | -849.80                              | 27.33    | -11208.50 | 4379.24  | -7412.92  | 976.99   | -8689.93  | 3042.82  |
| Fumarate        | 9.51                                 | 1.53     | 3.33      | 7.05     | -5.99     | 5.17     | 7.73      | 7.70     |
| Glucose         | -3.06E+04                            | 1.46E+03 | -7.45E+04 | 2.84E+04 | -5.70E+04 | 2.89E+03 | -4.71E+04 | 1.59E+04 |
| Glutamate       | -363.96                              | 16.87    | -1684.55  | 545.01   | -1156.97  | 278.89   | -984.70   | 745.81   |
| Glutamine       | 731.62                               | 116.28   | 4348.88   | 2479.66  | 2935.25   | 621.45   | 4928.27   | 1647.99  |
| Glycerol        | 50.34                                | 215.89   | -1355.06  | 636.03   | -270.21   | 875.76   | -121.23   | 274.29   |
| Glycine         | 501.91                               | 105.28   | 834.01    | 1300.99  | 305.78    | 260.33   | 2371.19   | 769.92   |
| Histidine       | 56.36                                | 16.27    | 212.86    | 308.69   | 144.00    | 102.46   | 493.52    | 155.78   |
| Hydroxyproline  | 75.12                                | 24.60    | -422.38   | 1267.25  | -797.09   | 250.99   | 297.42    | 472.25   |
| Hypoxanthine    | 0.00                                 | 0.00     | -67.03    | 6.80     | -35.97    | 12.42    | -41.35    | 19.96    |
| Isoleucine      | 60.25                                | 49.94    | -1495.97  | 1328.58  | -1031.91  | 347.04   | -153.77   | 454.77   |
| Ketoisoleucine  | 21.34                                | 3.28     | 412.75    | 128.09   | 254.50    | 38.20    | 374.04    | 72.40    |
| Ketoleucine     | 2.81                                 | 2.67     | 256.94    | 116.22   | 160.66    | 20.49    | 284.83    | 71.19    |
| Lactate         | 3.82E+04                             | 2.38E+03 | 1.26E+05  | 2.94E+04 | 6.44E+04  | 1.27E+04 | 1.07E+05  | 3.31E+04 |
| Leucine         | 19.93                                | 32.15    | -796.13   | 1384.01  | -671.05   | 350.71   | 567.73    | 513.77   |
| Lysine          | 209.60                               | 18.54    | 263.67    | 577.56   | -56.24    | 234.03   | 702.70    | 422.37   |
| Malate          | -5.69                                | 22.51    | -847.95   | 203.38   | -468.52   | 112.06   | -569.77   | 163.96   |
| Mannose         | -43.79                               | 6.75     | -687.35   | 162.83   | -223.29   | 110.36   | -282.76   | 152.36   |
| Methionine      | -15.02                               | 8.17     | -339.34   | 383.10   | -296.41   | 95.88    | 6.21      | 126.49   |
| myo-Inositol    | -60.26                               | 44.66    | -1432.76  | 1351.03  | -985.48   | 338.03   | -209.22   | 497.65   |
| Ornithine       | -19.80                               | 1.71     | 580.05    | 515.67   | -185.99   | 159.68   | 534.43    | 365.61   |
| Phenylalanine   | -9.66                                | 8.99     | 35.08     | 386.14   | -42.66    | 115.28   | 424.21    | 209.71   |
| Phosphocholine  | -42.20                               | 2.06     | -39.00    | 79.13    | 28.15     | 10.41    | 55.85     | 36.50    |
| Phosphocreatine | 26.65                                | 2.93     | 0.92      | 91.07    | -37.60    | 39.10    | 24.76     | 61.38    |
| Proline         | -27.75                               | 19.26    | -909.08   | 908.69   | -702.52   | 386.96   | 107.03    | 578.18   |
| Propionate      | 8.27                                 | 1.83     | 104.82    | 94.64    | 47.78     | 9.90     | 116.00    | 63.44    |
| Pyroglutamate   | -386.27                              | 147.17   | -616.44   | 5452.74  | -2276.92  | 1286.63  | 1583.49   | 1802.24  |
| Pyruvate        | -336.50                              | 16.08    | -1580.09  | 439.62   | -1538.96  | 147.93   | -1731.70  | 295.65   |
| Serine          | -284.36                              | 81.68    | -1001.30  | 3332.70  | -1924.15  | 598.78   | 806.33    | 1076.66  |
| Taurine         | -171.82                              | 58.65    | 27.40     | 100.51   | -208.39   | 60.11    | 40.39     | 201.45   |
| Threonine       | -126.26                              | 21.48    | 516.58    | 651.83   | 335.21    | 200.79   | 1115.18   | 266.43   |
| Tryptophan      | -53.91                               | 15.29    | -23.38    | 86.05    | -4.26     | 40.38    | 57.54     | 45.49    |
| Tyrosine        | 18.25                                | 9.11     | -2.02     | 484.60   | -94.70    | 133.44   | 433.50    | 243.83   |

|        |           |          |           |          |           |          |           |          |
|--------|-----------|----------|-----------|----------|-----------|----------|-----------|----------|
| Urea   | -1.15E+03 | 1.46E+02 | -1.42E+04 | 1.03E+04 | -1.66E+04 | 4.69E+03 | -7.84E+03 | 2.65E+03 |
| Valine | 10.00     | 45.69    | -109.29   | 799.76   | -55.95    | 265.10   | 661.69    | 340.03   |

<sup>2</sup>A total of 51 metabolites were identified in extracellular M2 MΦ subtype spectra and exported as  $\mu$ M concentrations. The data were normalized using sham media controls, the running NMR buffer volume, and protein content to report concentrations as nmol/mg. The mean and standard deviation (SD) for each normalized metabolite is shown for the M2a, M2b, M2c and M2d MΦ subtypes. Abbreviations denote: 2-HB, 2-hydroxybutyrate; 2-HIB, 2-hydroxyisobutyrate; 3-HB, 3-hydroxybutyrate; 3-HIB, 3-hydroxyisobutyrate.

**Table S3.** One-way parametric ANOVA analysis of intracellular M2a, M2b, M2c, and M2d MΦ metabolite levels with Tukey's post-hoc analysis.

| Name            | f.value | p.value  | -log10(p) | FDR      | Tukey's Post-Hoc Tests                      |
|-----------------|---------|----------|-----------|----------|---------------------------------------------|
| G1P             | 175.78  | 1.54E-14 | 13.81     | 6.07E-13 | M2b-M2a; M2c-M2a; M2d-M2a                   |
| PEtn            | 165.70  | 2.72E-14 | 13.57     | 6.07E-13 | M2b-M2a; M2c-M2a; M2d-M2a; M2c-M2b; M2d-M2b |
| Niacinamide     | 157.25  | 4.50E-14 | 13.35     | 6.07E-13 | M2b-M2a; M2c-M2a; M2d-M2a; M2c-M2b; M2d-M2b |
| Quinolate       | 157.25  | 4.50E-14 | 13.35     | 6.07E-13 | M2b-M2a; M2c-M2a; M2d-M2a; M2c-M2b; M2d-M2b |
| Taurine         | 151.21  | 6.54E-14 | 13.19     | 7.06E-13 | M2b-M2a; M2c-M2a; M2d-M2a                   |
| GPC             | 140.96  | 1.28E-13 | 12.89     | 1.15E-12 | M2b-M2a; M2c-M2a; M2d-M2a; M2c-M2b; M2d-M2b |
| ATP             | 115.90  | 8.18E-13 | 12.09     | 6.31E-12 | M2b-M2a; M2c-M2a; M2d-M2a; M2c-M2b          |
| Choline         | 112.88  | 1.05E-12 | 11.98     | 7.08E-12 | M2b-M2a; M2c-M2a; M2d-M2a; M2c-M2b          |
| Urea            | 64.22   | 1.92E-10 | 9.72      | 1.15E-09 | M2b-M2a; M2c-M2a; M2d-M2a                   |
| Succinate       | 52.62   | 1.13E-09 | 8.95      | 6.12E-09 | M2b-M2a; M2c-M2a; M2d-M2a; M2c-M2b; M2d-M2b |
| NAD+            | 51.84   | 1.29E-09 | 8.89      | 6.35E-09 | M2b-M2a; M2c-M2a; M2d-M2a; M2d-M2c          |
| Propionate      | 48.52   | 2.31E-09 | 8.64      | 1.04E-08 | M2b-M2a; M2c-M2a; M2d-M2a; M2c-M2b          |
| Formate         | 41.42   | 9.07E-09 | 8.04      | 3.77E-08 | M2b-M2a; M2c-M2a; M2d-M2a; M2c-M2b; M2d-M2b |
| Ornithine       | 40.99   | 9.92E-09 | 8.00      | 3.83E-08 | M2b-M2a; M2c-M2a; M2d-M2a; M2d-M2c          |
| Lysine          | 30.82   | 1.07E-07 | 6.97      | 3.86E-07 | M2b-M2a; M2c-M2a; M2d-M2a                   |
| Ketoleucine     | 28.20   | 2.19E-07 | 6.66      | 7.41E-07 | M2b-M2a; M2c-M2a; M2d-M2a                   |
| GTP             | 26.46   | 3.64E-07 | 6.44      | 1.16E-06 | M2b-M2a; M2c-M2a; M2d-M2a                   |
| Serine          | 25.66   | 4.64E-07 | 6.33      | 1.39E-06 | M2b-M2a; M2c-M2a; M2d-M2a                   |
| Ketoleucine     | 24.99   | 5.71E-07 | 6.24      | 1.62E-06 | M2b-M2a; M2c-M2a; M2d-M2a                   |
| Histidine       | 24.02   | 7.76E-07 | 6.11      | 2.10E-06 | M2b-M2a; M2c-M2a; M2d-M2a                   |
| Fumarate        | 23.08   | 1.06E-06 | 5.98      | 2.72E-06 | M2b-M2a; M2c-M2a; M2d-M2a; M2c-M2b; M2d-M2b |
| Alanine         | 22.74   | 1.18E-06 | 5.93      | 2.91E-06 | M2b-M2a; M2c-M2a; M2d-M2a                   |
| Phenylalanine   | 21.98   | 1.53E-06 | 5.81      | 3.60E-06 | M2b-M2a; M2c-M2a; M2d-M2a                   |
| Glutamine       | 19.53   | 3.70E-06 | 5.43      | 8.33E-06 | M2b-M2a; M2c-M2a; M2d-M2a; M2d-M2c          |
| Acetate         | 18.84   | 4.81E-06 | 5.32      | 1.04E-05 | M2b-M2a; M2c-M2a; M2d-M2a                   |
| Aspartate       | 18.01   | 6.67E-06 | 5.18      | 1.39E-05 | M2b-M2a; M2c-M2a; M2d-M2a; M2c-M2b          |
| Proline         | 17.71   | 7.52E-06 | 5.12      | 1.42E-05 | M2b-M2a; M2c-M2a; M2d-M2a                   |
| Glycine         | 17.68   | 7.61E-06 | 5.12      | 1.42E-05 | M2b-M2a; M2c-M2a; M2d-M2a                   |
| myo-Inositol    | 17.66   | 7.65E-06 | 5.12      | 1.42E-05 | M2b-M2a; M2c-M2a; M2d-M2a                   |
| Valine          | 16.79   | 1.10E-05 | 4.96      | 1.97E-05 | M2b-M2a; M2c-M2a; M2d-M2a                   |
| Malonate        | 16.65   | 1.16E-05 | 4.93      | 2.03E-05 | M2b-M2a; M2c-M2a; M2d-M2a                   |
| Glucose         | 16.40   | 1.29E-05 | 4.89      | 2.18E-05 | M2b-M2a; M2c-M2a; M2d-M2a                   |
| Arginine        | 15.73   | 1.73E-05 | 4.76      | 2.83E-05 | M2b-M2a; M2c-M2a; M2d-M2a; M2d-M2b          |
| Methionine      | 15.20   | 2.18E-05 | 4.66      | 3.47E-05 | M2b-M2a; M2c-M2a; M2d-M2a                   |
| AMP             | 15.04   | 2.35E-05 | 4.63      | 3.62E-05 | M2c-M2a; M2d-M2a; M2c-M2b; M2d-M2b          |
| Tyrosine        | 14.44   | 3.08E-05 | 4.51      | 4.55E-05 | M2b-M2a; M2c-M2a; M2d-M2a                   |
| Glycerol        | 14.42   | 3.12E-05 | 4.51      | 4.55E-05 | M2b-M2a; M2c-M2a; M2d-M2a                   |
| Pyroglutamate   | 14.12   | 3.59E-05 | 4.44      | 5.11E-05 | M2b-M2a; M2c-M2a; M2d-M2a                   |
| Creatine        | 14.00   | 3.79E-05 | 4.42      | 5.25E-05 | M2b-M2a; M2c-M2a; M2d-M2a; M2c-M2b          |
| Glutamate       | 13.41   | 5.05E-05 | 4.30      | 6.81E-05 | M2b-M2a; M2c-M2b; M2d-M2b                   |
| Beta-Alanine    | 13.11   | 5.83E-05 | 4.23      | 7.68E-05 | M2b-M2a; M2c-M2b; M2d-M2b                   |
| Phosphocholine  | 12.54   | 7.75E-05 | 4.11      | 9.97E-05 | M2b-M2a; M2c-M2a; M2d-M2a                   |
| Phosphocreatine | 12.30   | 8.78E-05 | 4.06      | 1.10E-04 | M2c-M2a; M2d-M2a; M2c-M2b; M2d-M2b          |



|              |      |          |      |          |                           |
|--------------|------|----------|------|----------|---------------------------|
| UMP          | 9.98 | 3.13E-04 | 3.50 | 3.84E-04 | M2b-M2a; M2c-M2a; M2d-M2a |
| Asparagine   | 9.53 | 4.09E-04 | 3.39 | 4.91E-04 | M2b-M2a; M2c-M2a; M2d-M2a |
| Leucine      | 9.41 | 4.39E-04 | 3.36 | 5.15E-04 | M2b-M2a; M2c-M2a; M2d-M2a |
| Lactate      | 7.67 | 1.33E-03 | 2.88 | 1.53E-03 | M2b-M2a; M2c-M2a          |
| Isocaproate  | 6.92 | 2.22E-03 | 2.65 | 2.50E-03 | M2b-M2a; M2c-M2b; M2d-M2b |
| Hypoxanthine | 6.84 | 2.36E-03 | 2.63 | 2.60E-03 | M2d-M2a; M2d-M2b          |
| NADPH        | 4.64 | 1.27E-02 | 1.89 | 1.38E-02 | M2d-M2a                   |
| Isoleucine   | 4.56 | 1.36E-02 | 1.87 | 1.44E-02 | M2b-M2a; M2c-M2a          |
| Glutathione  | 3.91 | 2.39E-02 | 1.62 | 2.48E-02 | M2c-M2b                   |
| Betaine      | 3.75 | 2.74E-02 | 1.56 | 2.80E-02 | M2c-M2a                   |

A total of 53 metabolites were identified through the ANOVA analysis of the intracellular M2 MΦ subtypes to have metabolite level differences that discriminated M2a, M2b, M2c, and M2d subtypes from each other. Abbreviations denote: AMP, adenosine monophosphate; ATP, adenosine, triphosphate; G1P, glucose-1-phosphate; GPC, glycerophosphocholine; GTP, guanosine triphosphate; NAD<sup>+</sup>, nicotinamide adenine dinucleotide; NADPH, nicotinamide adenine dinucleotide phosphate; PEtn, phosphatidyl ethanolamine; UMP, uridine monophosphate.

**Table S4.** One-way parametric ANOVA analysis of extracellular M2a, M2b, M2c, and M2d MΦ metabolite levels with Tukey's post-hoc analysis.

| Name           | f.value | p.value  | -log10(p) | FDR      | Tukey's Post-Hoc Tests                      |
|----------------|---------|----------|-----------|----------|---------------------------------------------|
| Allantoin      | 3379.80 | 3.23E-27 | 26.49     | 1.62E-25 | M2b-M2a; M2c-M2a; M2d-M2a; M2c-M2b; M2d-M2c |
| Ketoleucine    | 216.02  | 2.11E-15 | 14.68     | 5.28E-14 | M2b-M2a; M2c-M2a; M2d-M2a; M2c-M2b; M2d-M2c |
| Fructose       | 104.37  | 2.19E-12 | 11.66     | 3.19E-11 | M2b-M2a; M2c-M2a; M2d-M2a                   |
| Pyruvate       | 102.68  | 2.55E-12 | 11.59     | 3.19E-11 | M2b-M2a; M2c-M2a; M2d-M2a                   |
| Mannose        | 44.35   | 5.05E-09 | 8.30      | 5.05E-08 | M2b-M2a; M2c-M2a; M2d-M2a; M2c-M2b; M2d-M2b |
| 2-HIB          | 37.51   | 2.11E-08 | 7.68      | 1.75E-07 | M2b-M2a; M2c-M2a; M2d-M2a                   |
| Aspartate      | 27.68   | 2.55E-07 | 6.59      | 1.82E-06 | M2b-M2a; M2c-M2a; M2d-M2a; M2d-M2b          |
| Lactate        | 26.47   | 3.63E-07 | 6.44      | 2.27E-06 | M2b-M2a; M2c-M2a; M2d-M2a; M2c-M2b; M2d-M2c |
| Glutamine      | 17.94   | 6.85E-06 | 5.16      | 3.81E-05 | M2b-M2a; M2c-M2a; M2d-M2a                   |
| 3-HIB          | 16.86   | 1.06E-05 | 4.97      | 5.32E-05 | M2b-M2a; M2c-M2a; M2d-M2a; M2d-M2c          |
| Propionate     | 16.49   | 1.24E-05 | 4.91      | 5.65E-05 | M2b-M2a; M2c-M2a; M2d-M2a                   |
| Betaine        | 16.28   | 1.36E-05 | 4.87      | 5.67E-05 | M2c-M2a; M2d-M2a; M2c-M2b; M2d-M2b          |
| Malate         | 15.85   | 1.64E-05 | 4.79      | 6.30E-05 | M2b-M2a; M2c-M2a; M2d-M2a                   |
| Formate        | 15.26   | 2.13E-05 | 4.67      | 7.60E-05 | M2d-M2a; M2d-M2b; M2d-M2c                   |
| Phosphocholine | 10.87   | 1.88E-04 | 3.73      | 6.28E-04 | M2c-M2a; M2d-M2a; M2c-M2b                   |
| Ketoleucine    | 10.60   | 2.19E-04 | 3.66      | 6.85E-04 | M2b-M2a; M2c-M2a; M2d-M2a                   |
| Threonine      | 10.40   | 2.46E-04 | 3.61      | 7.22E-04 | M2b-M2a; M2c-M2a; M2d-M2a                   |
| Fumarate       | 10.04   | 3.02E-04 | 3.52      | 8.40E-04 | M2c-M2a; M2c-M2b; M2d-M2c                   |
| 2-HB           | 9.09    | 5.32E-04 | 3.27      | 1.33E-03 | M2b-M2a; M2c-M2b; M2d-M2b                   |
| Glucose        | 9.06    | 5.44E-04 | 3.26      | 1.33E-03 | M2b-M2a; M2c-M2a                            |
| Methionine     | 9.02    | 5.57E-04 | 3.25      | 1.33E-03 | M2d-M2a; M2d-M2b; M2d-M2c                   |
| Pyroglutamate  | 8.85    | 6.20E-04 | 3.21      | 1.41E-03 | M2b-M2a; M2d-M2a; M2c-M2b; M2d-M2c          |
| Hydroxyproline | 8.67    | 6.94E-04 | 3.16      | 1.51E-03 | M2c-M2a; M2d-M2c                            |
| Glutamate      | 8.28    | 8.88E-04 | 3.05      | 1.85E-03 | M2b-M2a; M2c-M2a                            |
| Acetate        | 7.54    | 1.45E-03 | 2.84      | 2.86E-03 | M2b-M2a; M2c-M2a; M2d-M2b                   |
| Serine         | 7.50    | 1.49E-03 | 2.83      | 2.86E-03 | M2d-M2a; M2d-M2c                            |
| Ornithine      | 6.29    | 3.52E-03 | 2.45      | 6.52E-03 | M2b-M2a; M2d-M2a; M2d-M2c                   |
| Isoleucine     | 5.84    | 4.90E-03 | 2.31      | 8.75E-03 | M2b-M2a; M2c-M2a                            |
| Creatine       | 5.58    | 6.00E-03 | 2.22      | 1.04E-02 | M2c-M2a; M2d-M2c                            |
| Leucine        | 5.41    | 6.87E-03 | 2.16      | 1.14E-02 | M2c-M2a; M2d-M2c                            |
| Choline        | 4.53    | 1.40E-02 | 1.85      | 2.25E-02 | M2d-M2c                                     |
| Tryptophan     | 4.38    | 1.58E-02 | 1.80      | 2.48E-02 | M2d-M2a                                     |
| Taurine        | 4.08    | 2.06E-02 | 1.69      | 3.12E-02 |                                             |

A total of 33 metabolites were identified through the ANOVA analysis of the extracellular M2 MΦ subtypes to have metabolite level differences that discriminated M2a, M2b, M2c, and M2d subtypes from each other. Abbreviations denote: 2-HB, 2-hydroxybutyrate; 2-HIB, 2-hydroxyisobutyrate; 3-HIB, 3-hydroxyisobutyrate.

**Table S5.** One-way parametric ANOVA analysis of intracellular M2b, M2c, and M2d MΦ metabolite levels with Tukey's post-hoc analysis.

| Name            | f.value | p.value  | -log10(p) | FDR      | Tukey's Post-Hoc Tests |
|-----------------|---------|----------|-----------|----------|------------------------|
| GPC             | 36.19   | 1.82E-06 | 5.74      | 9.83E-05 | M2c-M2b; M2d-M2b       |
| PEtn            | 18.89   | 7.98E-05 | 4.10      | 2.16E-03 | M2c-M2b; M2d-M2b       |
| Glutamate       | 15.75   | 2.06E-04 | 3.69      | 3.71E-03 | M2c-M2b; M2d-M2b       |
| AMP             | 13.90   | 3.85E-04 | 3.41      | 5.20E-03 | M2c-M2b; M2d-M2b       |
| β-Alanine       | 11.29   | 1.02E-03 | 2.99      | 1.10E-02 | M2c-M2b; M2d-M2b       |
| Isocaproate     | 10.34   | 1.50E-03 | 2.82      | 1.14E-02 | M2c-M2b; M2d-M2b       |
| Phosphocreatine | 10.22   | 1.58E-03 | 2.80      | 1.14E-02 | M2c-M2b; M2d-M2b       |
| Formate         | 10.06   | 1.69E-03 | 2.77      | 1.14E-02 | M2c-M2b; M2d-M2b       |
| Choline         | 8.50    | 3.41E-03 | 2.47      | 1.58E-02 | M2c-M2b                |
| NAD+            | 8.35    | 3.65E-03 | 2.44      | 1.58E-02 | M2d-M2c                |
| ATP             | 8.26    | 3.81E-03 | 2.42      | 1.58E-02 | M2c-M2b; M2d-M2b       |
| Niacinamide     | 8.26    | 3.81E-03 | 2.42      | 1.58E-02 | M2c-M2b; M2d-M2b       |
| Quinolate       | 8.26    | 3.81E-03 | 2.42      | 1.58E-02 | M2c-M2b; M2d-M2b       |
| Creatine        | 7.61    | 5.22E-03 | 2.28      | 2.02E-02 | M2c-M2b; M2d-M2c       |
| Fumarate        | 7.36    | 5.94E-03 | 2.23      | 2.14E-02 | M2c-M2b; M2d-M2b       |
| Succinate       | 6.74    | 8.14E-03 | 2.09      | 2.75E-02 | M2c-M2b; M2d-M2b       |

A total of 16 metabolites were identified through the ANOVA analysis of the intracellular M2 MΦ subtypes to have metabolite level differences that discriminated M2b, M2c, and M2d subtypes from each other. Abbreviations denote: AMP, adenosine monophosphate; ATP, adenosine triphosphate; GPC, glycerophosphocholine; NAD+, nicotinamide adenine dinucleotide; PEtn, phosphatidyl ethanolamine.

**Table S6.** One-way parametric ANOVA analysis of extracellular M2b, M2c, and M2d MΦ metabolite levels with Tukey's post-hoc analysis.

| <b>Name</b>    | <b>f.value</b> | <b>p.value</b> | <b>-log10(p)</b> | <b>FDR</b> | <b>Tukey's Post-Hoc Tests</b> |
|----------------|----------------|----------------|------------------|------------|-------------------------------|
| Formate        | 13.29          | 4.77E-04       | 3.32             | 1.75E-02   | M2d-M2b; M2d-M2c              |
| Allantoin      | 11.44          | 9.59E-04       | 3.02             | 1.75E-02   | M2c-M2b; M2d-M2c              |
| Mannose        | 11.27          | 1.03E-03       | 2.99             | 1.75E-02   | M2c-M2b; M2d-M2b              |
| Methionine     | 9.50           | 2.16E-03       | 2.67             | 2.52E-02   | M2d-M2b; M2d-M2c              |
| 2-HB           | 9.20           | 2.47E-03       | 2.61             | 2.52E-02   | M2c-M2b; M2d-M2b              |
| Lactate        | 8.59           | 3.26E-03       | 2.49             | 2.77E-02   | M2c-M2b; M2d-M2c              |
| Hypoxanthine   | 7.40           | 5.81E-03       | 2.24             | 2.88E-02   | M2c-M2b; M2d-M2b              |
| Leucine        | 7.35           | 5.96E-03       | 2.23             | 2.88E-02   | M2d-M2c                       |
| Betaine        | 7.29           | 6.13E-03       | 2.21             | 2.88E-02   | M2c-M2b; M2d-M2b              |
| Pyroglutamate  | 7.28           | 6.16E-03       | 2.21             | 2.88E-02   | M2c-M2b; M2d-M2c              |
| Fumarate       | 7.26           | 6.24E-03       | 2.20             | 2.88E-02   | M2c-M2b; M2d-M2c              |
| Creatine       | 6.82           | 7.83E-03       | 2.11             | 2.88E-02   | M2d-M2c                       |
| Malate         | 6.67           | 8.48E-03       | 2.07             | 2.88E-02   | M2c-M2b                       |
| Hydroxyproline | 6.56           | 8.96E-03       | 2.05             | 2.88E-02   | M2d-M2c                       |
| Choline        | 6.56           | 8.96E-03       | 2.05             | 2.88E-02   | M2d-M2c                       |
| Serine         | 6.55           | 9.02E-03       | 2.04             | 2.88E-02   | M2d-M2c                       |
| Ketoisoleucine | 13.29          | 4.77E-04       | 3.32             | 1.75E-02   | M2c-M2b; M2d-M2c              |

A total of 17 metabolites were identified through the ANOVA analysis of the extracellular M2 MΦ subtypes to have metabolite level differences that discriminated M2b, M2c, and M2d subtypes from each other. Abbreviations denote: 2-HB, 2-hydroxybutyrate.
